## CORRECTION

# Correction: Distinct roles of neuroepithelial-like and radial glia-like progenitor cells in cerebellar regeneration

**Jan Kaslin, Volker Kroehne, Julia Ganz, Stefan Hans and Michael Brand**

There was an error in Development **144**, 1462-1471.

Michael Brand should have been listed as co-author for correspondence. Correct details for correspondence are shown below:

Authors for correspondence (jan.kaslin@monash.edu; michael.brand@biotec.tu-dresden.de)

The online article has been amended. The authors apologise to readers for this mistake.
